# Supplementary material for: The GS-nitroxide JP4-039 improves intestinal barrier and stem cell recovery in irradiated mice
Source: PubMed Central journal article supplement (PMC5794877; doi:10.1038/s41598-018-20370-9), 2018-02-01

# **The GS-nitroxide JP4-039 improves intestinal barrier and stem cell recovery in irradiated mice**

Liang Wei<sup>1\*</sup>, Brian J. Leibowitz<sup>1\*</sup>, Michael Epperly<sup>2</sup>, Cheng Bi<sup>1,3</sup>, Allen Li<sup>1,4</sup>, Justin Steinman<sup>2</sup>, Peter Wipf<sup>3,5,6</sup>, Song Li<sup>6</sup>, Lin Zhang<sup>7</sup>, Joel Greenberger<sup>2</sup> and Jian Yu<sup>1,2#</sup>

<sup>1</sup>Department of Pathology, University of Pittsburgh School of Medicine, UPMC Hillman Cancer Center, PA 15213

<sup>2</sup>Department of Radiation Oncology, UPMC Hillman Cancer Center, PA 15213

<sup>3</sup>Department of Bioengineering, University of Pittsburgh, Swanson School of Engineering

<sup>4</sup>Department of Medicine, University of Pittsburgh, Pittsburgh, PA 15260

<sup>5</sup>Department of Chemistry, University of Pittsburgh, Pittsburgh, PA 15260

<sup>6</sup>Department of Pharmaceutical Science, University of Pittsburgh, Pittsburgh, PA 15260

<sup>7</sup>Department of Pharmacology and Chemical Biology, University of Pittsburgh School of Medicine, Pittsburgh, PA 15213

Running head: JP4-039 mitigates TBI-induced intestinal damage

Key words: radiation injury, Nitroxide, bone marrow transplantation, Notch, TGF- $\beta$

\*These authors contribute equality to this work.

#Correspondence:

Jian Yu, Ph.D., Hillman Cancer Center Research Pavilion, Suite 2.26h, 5117 Centre Ave, Pittsburgh, PA 15213. Email: yuj2@upmc.edu; Phone: 412-623-7786; Fax: 412-623-7778

## **Supplemental Methods**

### **Mice and Irradiation**

JP4-039 was synthesized and formulated in F14 emulsion as described<sup>1,2</sup>, and administered I.V. to deliver a dose of 20 mg/kg (approximately 400 µg/mouse) 24 h after TBI. In brief, JP4-039 (4 mg/ml) + 10% Sesame Oil + 5% Soy Phosphatidyl Choline + 85% Dulbecco's Phosphate-Buffered Saline was placed in ice water with a stream of nitrogen blowing over top. The preparation was sonicated for 1-2 h, and then injected into mice intravenously, at 100 µl containing 400 µg drug or no drug (control) per mouse.

Bone marrow transplant was performed as described<sup>3</sup>. In brief, 7-9 week-old female C57BL/6 mice (The Jackson Laboratory) received 10 Gy total body irradiation the day before receiving transplantation of  $1 \times 10^6$  whole marrow cells from 7-9 week-old male C57BL/6 donor mice. Following transplantation, mice were allowed 8 weeks for recovery and engraftment of transplanted bone marrow. Sex- and age-matched mice without radiation and BMT were used as control for tissue analysis. C57BL/6NTac mice received 9.25 Gy TBI before BMT similarly to match JP4-039 studies.

### **TUNEL and BrdU staining**

TUNEL (Terminal deoxynucleotidyl transferase dUTP nick-end labelling) staining was performed with the ApopTag In Situ Apoptosis Detection Kit (Millipore, Billerica, MA) according to the manufacturer's instructions.

For BrdU staining, sections were deparaffinized and rehydrated through graded ethanols, then treated with Proteinase K (20 µg/ml) for 20 min at 37 °C. Sections were then incubated with 2N HCl for 1 hour at room temperature. Mouse anti-BrdU primary antibody (A21301MP, Invitrogen, Carlsbad, CA; 1:100 in 10% goat serum) and Goat-anti-Mouse-biotin (1:100; #31802; Pierce, Rockford, IL) secondary antibody were used before amplification with the VectaStain ABC kit, and developed with 3,3'-Diaminobenzidine (DAB) (Vector Laboratories, Burlingame, CA).

### **Immunohistochemistry (IHC) and immunofluorescence (IF)**

**Mucin2 IF.** 20% goat serum was used as blocking solution at room temperature for 1 hour. Sections were incubated overnight at 4 °C with Rabbit-anti-Mucin2 (1:100; sc-15334; Santa Cruz Biotechnology, Santa Cruz, CA). Then the sections were incubated at room temperature for 1 hour with AlexaFluor-594 Goat-anti-Rabbit secondary antibodies (1:100; A11012, Invitrogen) and finally counterstained with VectaShield plus DAPI (Vector Laboratories).

**Chromogranin A IF.** 20% goat serum was used as blocking solution at room temperature for 1 hour. Sections were incubated overnight at 4°C with Rabbit-anti-Chromogranin A (1:100; ab15160; Abcam, Cambridge, MA). Then the sections were incubated at room temperature for 1 hour with AlexaFluor-594 Goat-anti-Rabbit secondary antibodies (1:100; A11012, Invitrogen) and finally counterstained with VectaShield plus DAPI (Vector Laboratories).

**ZO-1 IF.** 20% goat serum was used as blocking solution at room temperature for 1 hour. Sections were incubated overnight at 4 °C with Rabbit-anti-ZO-1 (1:100; 61-7300; ThermoFisher, Camarillo, CA). Then the sections were incubated at room temperature for 1 hour with AlexaFluor-594 Goat-anti-Rabbit secondary antibodies (1:100; A11012, Invitrogen) and finally counterstained with VectaShield plus DAPI (Vector Laboratories).

**Ly-6B.2 IF/IHC.** 20% goat serum was used as blocking solution at room temperature for 1 hour. Sections were incubated overnight at 4 °C with RAT-anti-Ly6B.2 (1:50; MCA771GT; AbD serotec, Hercules, CA). Then the sections were incubated at room temperature for 1 hour with AlexaFluor-594 Goat-anti-Rat secondary antibodies (1:100; A11007, Invitrogen) or biotinylated goat-anti-Rat secondary antibodies (1:100; 31830; Pierce, Rockford, IL) and finally counterstained with VectaShield plus DAPI (Vector Laboratories) or developed with ABC kit and DAB.

**$\gamma$ H2AX IF.** 20% goat serum was used as blocking solution at room temperature for 1 hour. Sections were incubated overnight at 4 °C with Mouse-anti- $\gamma$ H2AX (1:100; 05-636; Millipore, Billerica, MA). Then the sections were incubated at room temperature for 1 hour with AlexaFluor-594 Goat-anti-Mouse secondary antibodies (1:100; A11005, Invitrogen) and finally counterstained with VectaShield plus DAPI (Vector Laboratories).

**CD44 IF.** 20% goat serum was used as blocking solution at room temperature for 1 hour. Sections were incubated overnight at 4 °C with RAT-anti-CD44 (1:100; 130012; BioLegend, San Diego, CA). Then the sections were incubated at room temperature for 1 hour with AlexaFluor-594 Goat-anti-Rat secondary antibodies (1:100; A11007, Invitrogen) and finally counterstained with VectaShield plus DAPI (Vector Laboratories).

**Sox9 IF.** 20% goat serum was used as blocking solution at room temperature for 1 hour. Sections were incubated overnight at 4 °C with Rabbit-anti-Sox9 (1:100; AB5535; Millipore, Billerica, MA). Then the sections were incubated at room temperature for 1 hour with AlexaFluor-594 Goat-anti-Rabbit secondary antibodies (1:100; A11012, Invitrogen) and finally counterstained with VectaShield plus DAPI (Vector Laboratories).

**CD3 IHC.** 20% goat serum was used as blocking solution at room temperature for 1 hour. Sections were incubated overnight at 4 °C with Rabbit-anti-CD3 (1:100; NB600-1441SS; Novus, Littleton, CO). Then the sections were incubated at room temperature for 1 hour with biotinylated goat-anti-Rabbit secondary antibodies (1:100; 31822; Pierce, Rockford, IL) and finally counterstained with VectaShield plus DAPI (Vector Laboratories) or developed with ABC kit and DAB.

### Supplemental Tables

| Table S1: qRT-PCR primers used in the study |         |                      |            |
|---------------------------------------------|---------|----------------------|------------|
| Gene                                        | Primer  | Sequence             | Function   |
| BMP4-F                                      | Forward | 5'-AGCCCGCTTCTGCAGGA | ISC factor |

|                      |         |                                     |                 |
|----------------------|---------|-------------------------------------|-----------------|
| BMP4-R               | Reverse | 5'-AAAGGCTCAGAGAAGCTGCG             |                 |
| Noggin-F             | Forward | 5'-CGAGCGAGATCAAAGGGCT              | ISC factor      |
| Noggin-R             | Reverse | 5'-TCCTCCTCAGCTTCTTGCTCA            |                 |
| EGF-F                | Forward | 5'-AGCATCTCTCGGATTGACCCA            | ISC factor      |
| EGF-R                | Reverse | 5'-CCTGTCCCGTTAAGGAAAACCTCT         |                 |
| Lgr5-F               | Forward | 5'-GACAATGCTCTCACAGAC               | ISC marker      |
| Lgr5-R               | Reverse | 5'-GGAGTGGATTCTATTATTATGG           |                 |
| OLFM4-F              | Forward | 5'-GCCACTTTCCAATTTAC                | ISC marker      |
| OLFM4-R              | Reverse | 5'-GAGCCTCTTCTCATACAC               |                 |
| Mucin2-F             | Forward | 5'-GCCACCTCACAAGCAGTAT              | Goblet cell     |
| Mucin2-R             | Reverse | 5'-TGCCTTCAGGACAGAAGCAG             |                 |
| Sucrase Isomaltase-F | Forward | 5'-TTGATATCCGGTCCACGGTTCT           | Enterocyte      |
| Sucrase Isomaltase-R | Reverse | 5'-CAGGTGACATCCAGTTGCATT            |                 |
| Claudin-2-F          | Forward | 5'-TCTACGAGGGACTGTGGATG             | tight junction  |
| Claudin-2-R          | Reverse | 5'-TCAGATTCAGCAAGGAGTCG             |                 |
| Occludin-F           | Forward | 5'-GCTGTGATGTGTGTTGAGCT             | tight junction  |
| Occludin-R           | Reverse | 5'-GACGGTCTACCTGGAGGAAC             |                 |
| ZO-1-F               | Forward | 5'-ATCAAATCATTACGACCCTG             | tight junction  |
| ZO-1-R               | Reverse | 5'-TGAATGATCTATCCACAGCA             |                 |
| ZO-2-F               | Forward | 5'-CCATGGGCGCGGACTATCTGA            | tight junction  |
| ZO-2-R               | Reverse | 5'-CTGTGGCGGGGAGGTTGACTTG           |                 |
| ZO-3-F               | Forward | 5'-AAGCACGCACTCTGGATGTCACC          | tight junction  |
| ZO-3-R               | Reverse | 5'-GTCGCGCCTGCTGTTGCTGTATTA         |                 |
| IL-10-F              | Forward | 5'-ATTTGAATCCCTGGGTGAGAAG           | Cytokine        |
| IL-10-R              | Reverse | 5'-CACAGGGGAGAAATCGATGACA           |                 |
| IL-17a               | Forward | 5'-ATCAGGACGCGCAAACATGA             | Cytokine        |
| IL-17a               | Reverse | 5'-TTGGACACGCTGAGCTTTGA             |                 |
| IL-1 $\beta$ -F      | Forward | 5'-ATGGCAACTGTTCTGAACCTCAACT        | Cytokine        |
| IL-1 $\beta$ -R      | Reverse | 5'-CAGGACAGGTATAGATTCTTTCTTT        |                 |
| IL-6-F               | Forward | 5'-AGGATACCACTCCAACAGACCT           | Cytokine        |
| IL-6-R               | Reverse | 5'-CAAGTGCATCATCGTTGTTTCATAC        |                 |
| IL-22-F              | Forward | 5'-TTGAGGTGTCCAACCTCCAGCA           | Cytokine        |
| IL-22-R              | Reverse | 5'-AGCCGGACGTCTGTGTTGTTA            |                 |
| TNF $\alpha$ -F      | Forward | 5'-TTCTGTCTACTGAACTTCGGGGTGATCGGTCC | Cytokine        |
| TNF $\alpha$ -R      | Reverse | 5'-GTATGAGATAGCAAATCGGCTGACGGTGTGGG |                 |
| TGF $\beta$ -F       | Forward | 5'-CGCCATCTATGAGAAAACC              | Cytokine        |
| TGF $\beta$ -R       | Reverse | 5'-GTAACGCCAGGAATTGT                |                 |
| Dll1-F               | Forward | 5'-TGAGCCAGTCTTTCTTGAA              | Notch signaling |
| Dll1-R               | Reverse | 5'-AGACCCGAAGTGCCTTTGTA             |                 |
| Hes1-F               | Forward | 5'-CTCCCGGCATTCCAAGCTAG             | Notch signaling |
| Hes1-R               | Reverse | 5'-AGCGGGTCACCTCGTTCATG             |                 |

|         |         |                               |                 |
|---------|---------|-------------------------------|-----------------|
| Hes5-F  | Forward | 5'-AGTCCAAGGAGAAAACCGA        | Notch signaling |
| Hes5-R  | Reverse | 5'-GCTGTGTTTCAGGTAGCTGAC      |                 |
| Math1-F | Forward | 5'-ACATCTCCCAGATCCCACAG       | Notch signaling |
| Math1-R | Reverse | 5'-GGGCATTGGTTGTCTCAGT        |                 |
| Ngn3-F  | Forward | 5'-CTGCGCATAGCGGACCACAGCTTC   | Notch signaling |
| Ngn3-R  | Reverse | 5'-CTTACAAGAAGTCTGAGAACACCAG  |                 |
| Wnt2b-F | Forward | 5'-CACCCGGACTGATCTTGCT        | Wnt signaling   |
| Wnt2b-R | Reverse | 5'-TGTTTCTGCACTCCTGCAC        |                 |
| Wnt3a-F | Forward | 5' CACCACCGTCAGCAACAGCC       | Wnt signaling   |
| Wnt3a-R | Reverse | 5' AGGAGCGTGCTCACTGCGAAAG     |                 |
| Wnt5a-F | Forward | 5'-CACGCTATACCAACTCCTCTGC     | Wnt signaling   |
| Wnt5a-R | Reverse | 5'-AATATTCCAATGGGCTTCTTCATGGC |                 |
| p21-F   | Forward | 5'-ATGTCCAATCCTGGTGATGT       | p53 target      |
| p21-R   | Reverse | 5'-TGCAGCAGGGCAGAGGAAGT       |                 |
| PUMA-F  | Forward | 5'-ATGGCGGACGACCTCAAC         | p53 target      |
| PUMA-R  | Reverse | 5'-AGTCCCATGAAGAGATTGTACATGAC |                 |
| GAPDH-F | Forward | 5'-CTCTGGAAAGCTGTGGCGTGATG    | control         |
| GAPDH-R | Reverse | 5'-ATGCCAGTGAGCTCCCGTTCAG     |                 |

| <b>Table S2: Antibodies used in the study</b> |                    |                 |               |                |
|-----------------------------------------------|--------------------|-----------------|---------------|----------------|
| <b>ANTIGEN</b>                                | <b>APPLICATION</b> | <b>DILUTION</b> | <b>VENDOR</b> | <b>CATALOG</b> |
| Mucin2                                        | IF                 | 1/100           | Santa Cruz    | sc-15334       |
| Chromogranin A                                | IF                 | 1/100           | Abcam         | ab15160        |
| MMP7                                          | IF                 | 1/50            | A&D           | AF2967         |
| ZO-1                                          | IF                 | 1/100           | ThermoFisher  | 61-7300        |
| Ly-6B.2                                       | IHC                | 1/50            | AbDserotec    | MCA771GT       |
| CD3                                           | IHC                | 1/100           | Novus         | NB600-1441SS   |
| Ki-67                                         | IHC                | 1/100           | DAKO          | M7249          |
| $\gamma$ H2AX                                 | IF                 | 1/100           | Millipore     | 05-636         |
| CD44                                          | IF                 | 1/100           | BioLegend     | 130012         |
| Sox9                                          | IF                 | 1/100           | Millipore     | AB5535         |
| Anti-Rabbit Alexa-594                         | IF                 | 1/100           | Invitrogen    | A11012         |
| Anti-Rat Alexa-594                            | IF                 | 1/100           | Invitrogen    | A11017         |
| Anti-Mouse Alexa-594                          | IF                 | 1/100           | Invitrogen    | A11015         |
| Anti-Rabbit Biotin                            | IHC                | 1/100           | Pierce        | 31822          |
| Anti-Rat Biotin                               | IHC                | 1/100           | Pierce        | 31830          |
| p53                                           | WB                 | 1/1000          | Santa Cruz    | sc-6243        |
| PUMA                                          | WB                 | 1/1000          | Abcam         | ab9643         |
| p21                                           | WB                 | 1/1000          | Santa Cruz    | sc-397         |
| $\beta$ -actin                                | WB                 | 1/5000          | Sigma         | 5441           |
| Anti-Rabbit HRP                               | WB                 | 1/5000          | Pierce        | 31462          |

|                |    |        |        |       |
|----------------|----|--------|--------|-------|
| Anti-Mouse HRP | WB | 1/5000 | Pierce | 31432 |
|----------------|----|--------|--------|-------|

### Supplemental references

1. Goff JP, *et al.* Radiobiologic effects of GS-nitroxide (JP4-039) on the hematopoietic syndrome. *In Vivo* **25**, 315-323 (2011).
2. Epperly MW, *et al.* Effectiveness of Analogs of the GS-Nitroxide, JP4-039, as Total Body Irradiation Mitigators. *In Vivo* **31**, 39-43 (2017).
3. Leibowitz BJ, *et al.* Ionizing irradiation induces acute haematopoietic syndrome and gastrointestinal syndrome independently in mice. *Nat Commun* **5**, 3494 (2014).

### Supplemental Figure legends

**Figure S1. JP4-039 does not alter intestinal structure after TBI.** JP4-039 (20 mg/kg in F14 emulsion) or vehicle (Ctrl) was given to mice once 24 hr after 9.25 Gy TBI. Representative H&E staining of small intestine cross sections at Day 0, 2 and 12 after 9.25 Gy TBI. Scale bar = 500  $\mu$ m.

**Figure S2. JP4-039 mitigates abnormal intestinal differentiation after TBI.** JP4-039 (20 mg/kg in F14 emulsion) or vehicle (Ctrl) was given to mice once 24 hr after 9.25 Gy TBI. Intestinal tissues were analyzed at indicated times (day) after TBI. (A) Representative immunofluorescence of Mucin 2, and (B) CgA (Chromogranin A) in the crypts. Red, Mucin2/CgA; Blue, DAPI. Scale bar = 100  $\mu$ m. (C) Representative immunofluorescence of MMP7 in the crypts with indicated treatment. Red, MMP7; Blue, DAPI. Scale bar = 100  $\mu$ m. (D)



Quantification of MMP7+ crypt cells from C. <sup>+</sup>*P* < 0.05, 1-way ANOVA followed by Turkey's multiple comparisons test.

**Figure S3. JP4-039 maintains the intestinal barrier after TBI.** JP4-039 (JP4, 20 mg/kg in F14 emulsion) or vehicle (Ctrl) was given to mice once 24 hr after 9.25 Gy TBI. Intestinal tissues were analyzed at indicated times (day) after TBI. (A) Mucosal mRNA expression of *ZO-3* and *Claudin-2*. cDNA was synthesized from RNA pooled from 3 mice/group. Expression was normalized to that on Day 0, prior to TBI. Values are Mean  $\pm$  SEM; n = 3 mice in each group. **\*\**P* < 0.01, \**P* < 0.05, vehicle vs. JP4, unpaired 2-tailed Student's t test.** (B) Representative immunofluorescence staining of ZO-1. Red, ZO-1; Blue-DAPI. Scale bar = 25  $\mu$ m. (C) Representative immunofluorescence staining of ZO-1. Crypt areas are circled in yellow. Red, ZO-1; Blue-DAPI. Scale bar = 100  $\mu$ m. (D) Zoomed villus ZO-1 staining, which was unaffected by TBI or JP4-039. Scale bar = 25  $\mu$ m.

**Figure S4. The effects of JP4-039 on the p53 pathway.** JP4-039 (JP4, 20 mg/kg in F14 emulsion) or vehicle (Ctrl) was given to mice once 24 hr after 9.25 Gy TBI. Intestinal tissues were analyzed at the indicated time (day 2) after TBI. (A) Mucosal mRNA expression of *PUMA* and (B) *p21*. cDNA was synthesized from RNA pooled from 3 mice per group. Expression was normalized to that on Day 0, prior to TBI. (C) Mucosal expression of indicated proteins analyzed by western blotting.  $\beta$ -actin was used as the loading control. Lysates were pooled from 3 mice/group.

**Figure S5. The effects of JP4-039 on intestinal stem cells and signaling.** JP4-039 (20 mg/kg in F14 emulsion) or vehicle (Ctrl) was given to mice once 24 hr after 9.25 Gy TBI. Intestinal tissues were analyzed at indicated times (day) after TBI. (A-I) Mucosal mRNA expression of markers in Wnt (A-C), BMP and EGF (D-F) and Notch (G-I) signaling. cDNA was synthesized from RNA pooled from 3 mice/group. Expression was normalized to that on Day 0, prior to TBI. (A-I)  $*P < 0.05$ , vehicle vs. JP4, unpaired 2-tailed Student's t test. (A, C, E, G) values are Mean  $\pm$  SEM;  $n = 3$  mice in each group. (J) Representative immunofluorescence of CD44 (Red) and (K) Sox 9 (Red) in the crypts. Blue, DAPI. Scale bar = 100  $\mu$ m. (L) Quantification of CD44+ and (M) Sox9+ crypt cells.  $^{+++}P < 0.001$ , 1-way ANOVA followed by Turkey's multiple comparisons test.

**Figure S6. BMT modulates intestinal recovery after TBI.** BMT was performed in mice 24 hr after 9.25 Gy TBI. Intestinal tissues were analyzed at indicated times after TBI. (A) Representative H&E staining of intestinal sections on Day 12 after TBI. Scale bar = 100  $\mu$ m. (B) Quantification of crypt numbers, crypt depth, and villus length. Values are Mean  $\pm$  SEM;  $n = 3$  mice in each group.  $^{++}P < 0.01$ , 1-way ANOVA followed by Tukey's multiple comparisons test. (C) Mucosal mRNA expression of indicated markers. cDNA was synthesized from RNA pooled from 3 mice/group. Expression was normalized to that on Day 0, prior to TBI.  $*P < 0.05$ ,  $^{**}P < 0.001$ , R vs. IR/BMT, unpaired 2-tailed Student's t test.

**Figure S7. Persistent GI abnormalities in BMT TBI survivors.** Female C57BL/6 recipient mice were exposed to 10 Gy TBI followed by bone marrow transplantation (BMT) at 24 hr and recovery of 8 weeks. Intestinal tissues were analyzed in BMT recipients (IR/BMT) and age-

matched unirradiated (Un) mice. (A) H&E staining of small intestine cross sections. Scale bar = 500  $\mu\text{m}$ . (B) Quantification of crypt depth from A. (C) Representative immunofluorescence of ZO-1. Crypt areas are circled depicting reduced signals compared with the control. Red, ZO-1; Blue, DAPI. Scale bar = 100  $\mu\text{m}$ . (D) Zoomed images of crypt cells with intensive  $\gamma\text{H2AX}$  foci. Scale bar = 25  $\mu\text{m}$ . (E) Quantification of MMP7+ cells at +4 position or below (lower), (F) at the TA zone (upper), (G) Ki-67+, and (H) TUNEL+ crypt cells. (B, E-H), values are Mean  $\pm$  SEM; n = 3 mice in each group. \* $P < 0.05$ , unpaired 2-tailed Student's t test.

Fig S1 related to Fig 1

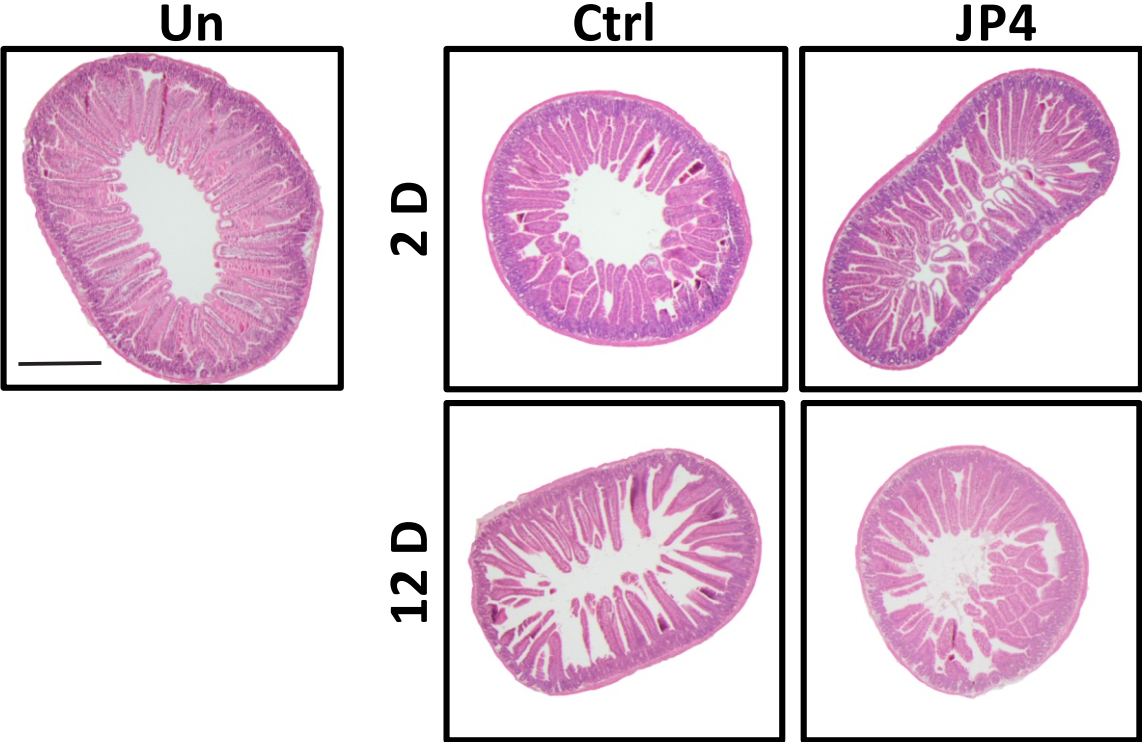

Fig S2 related to Fig 2

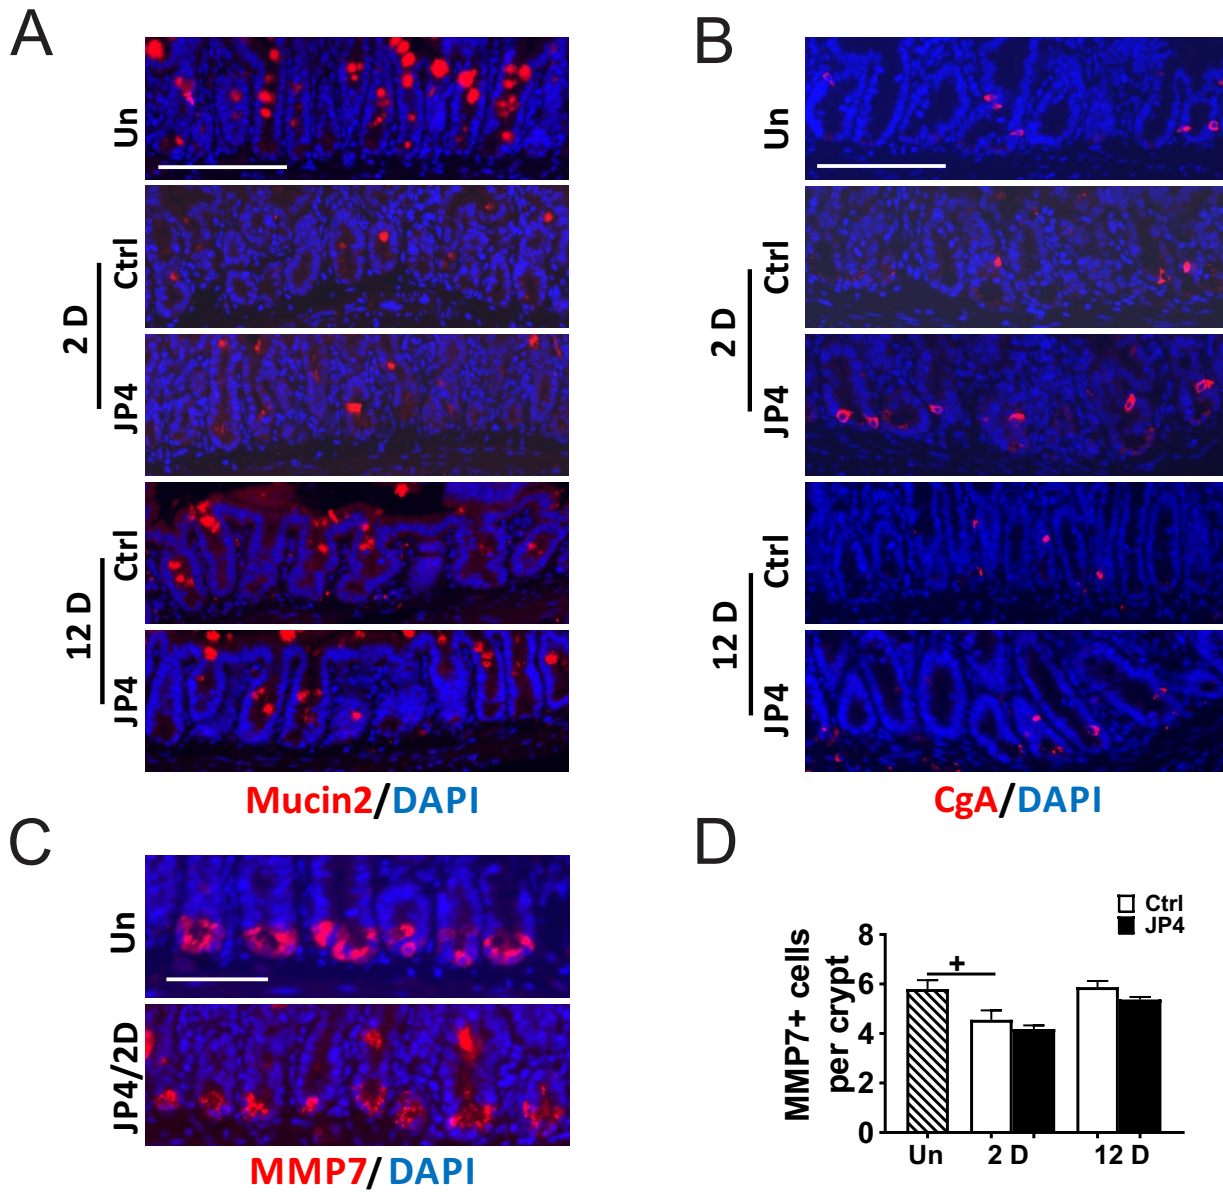

Fig S3 related to Fig 3

A

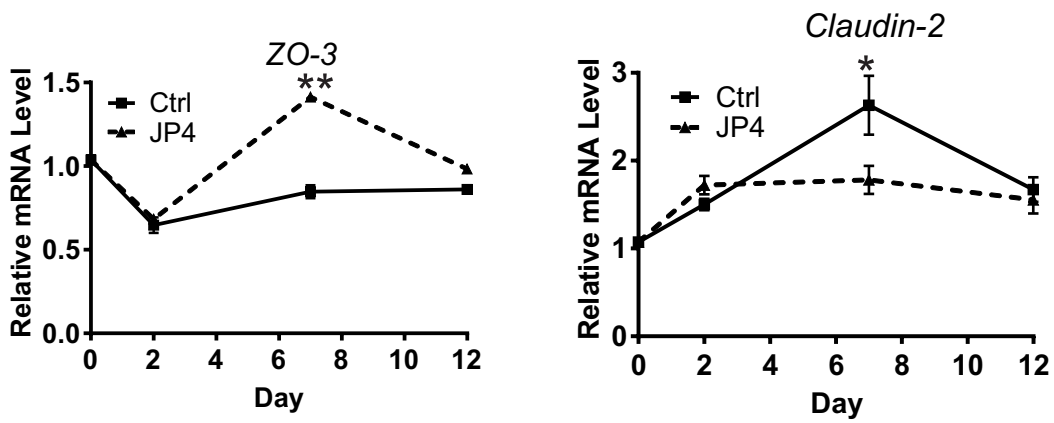

B

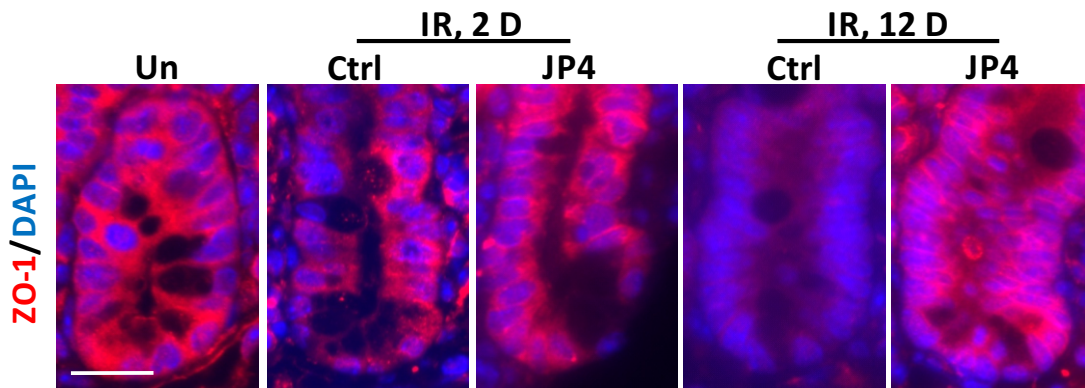

C

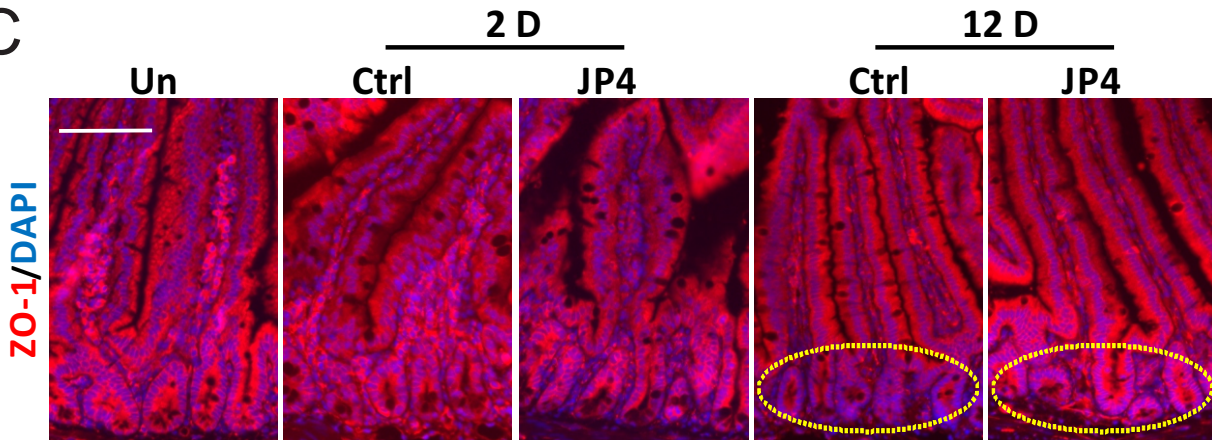

D

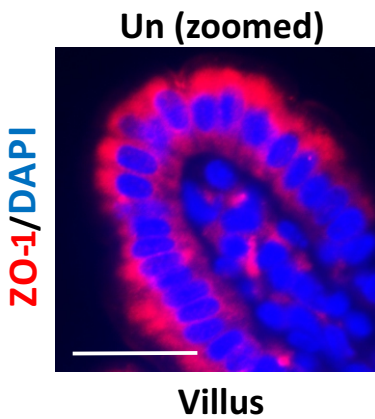

Fig S4 related to Fig 5

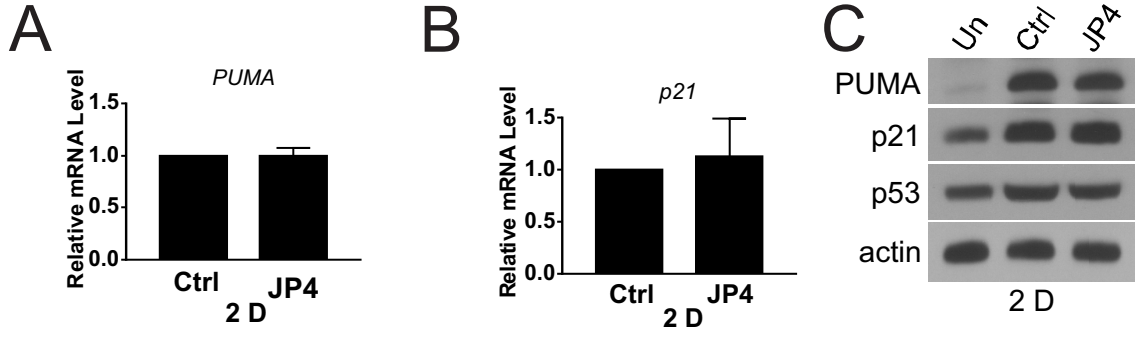

Fig S5 related to Fig 5

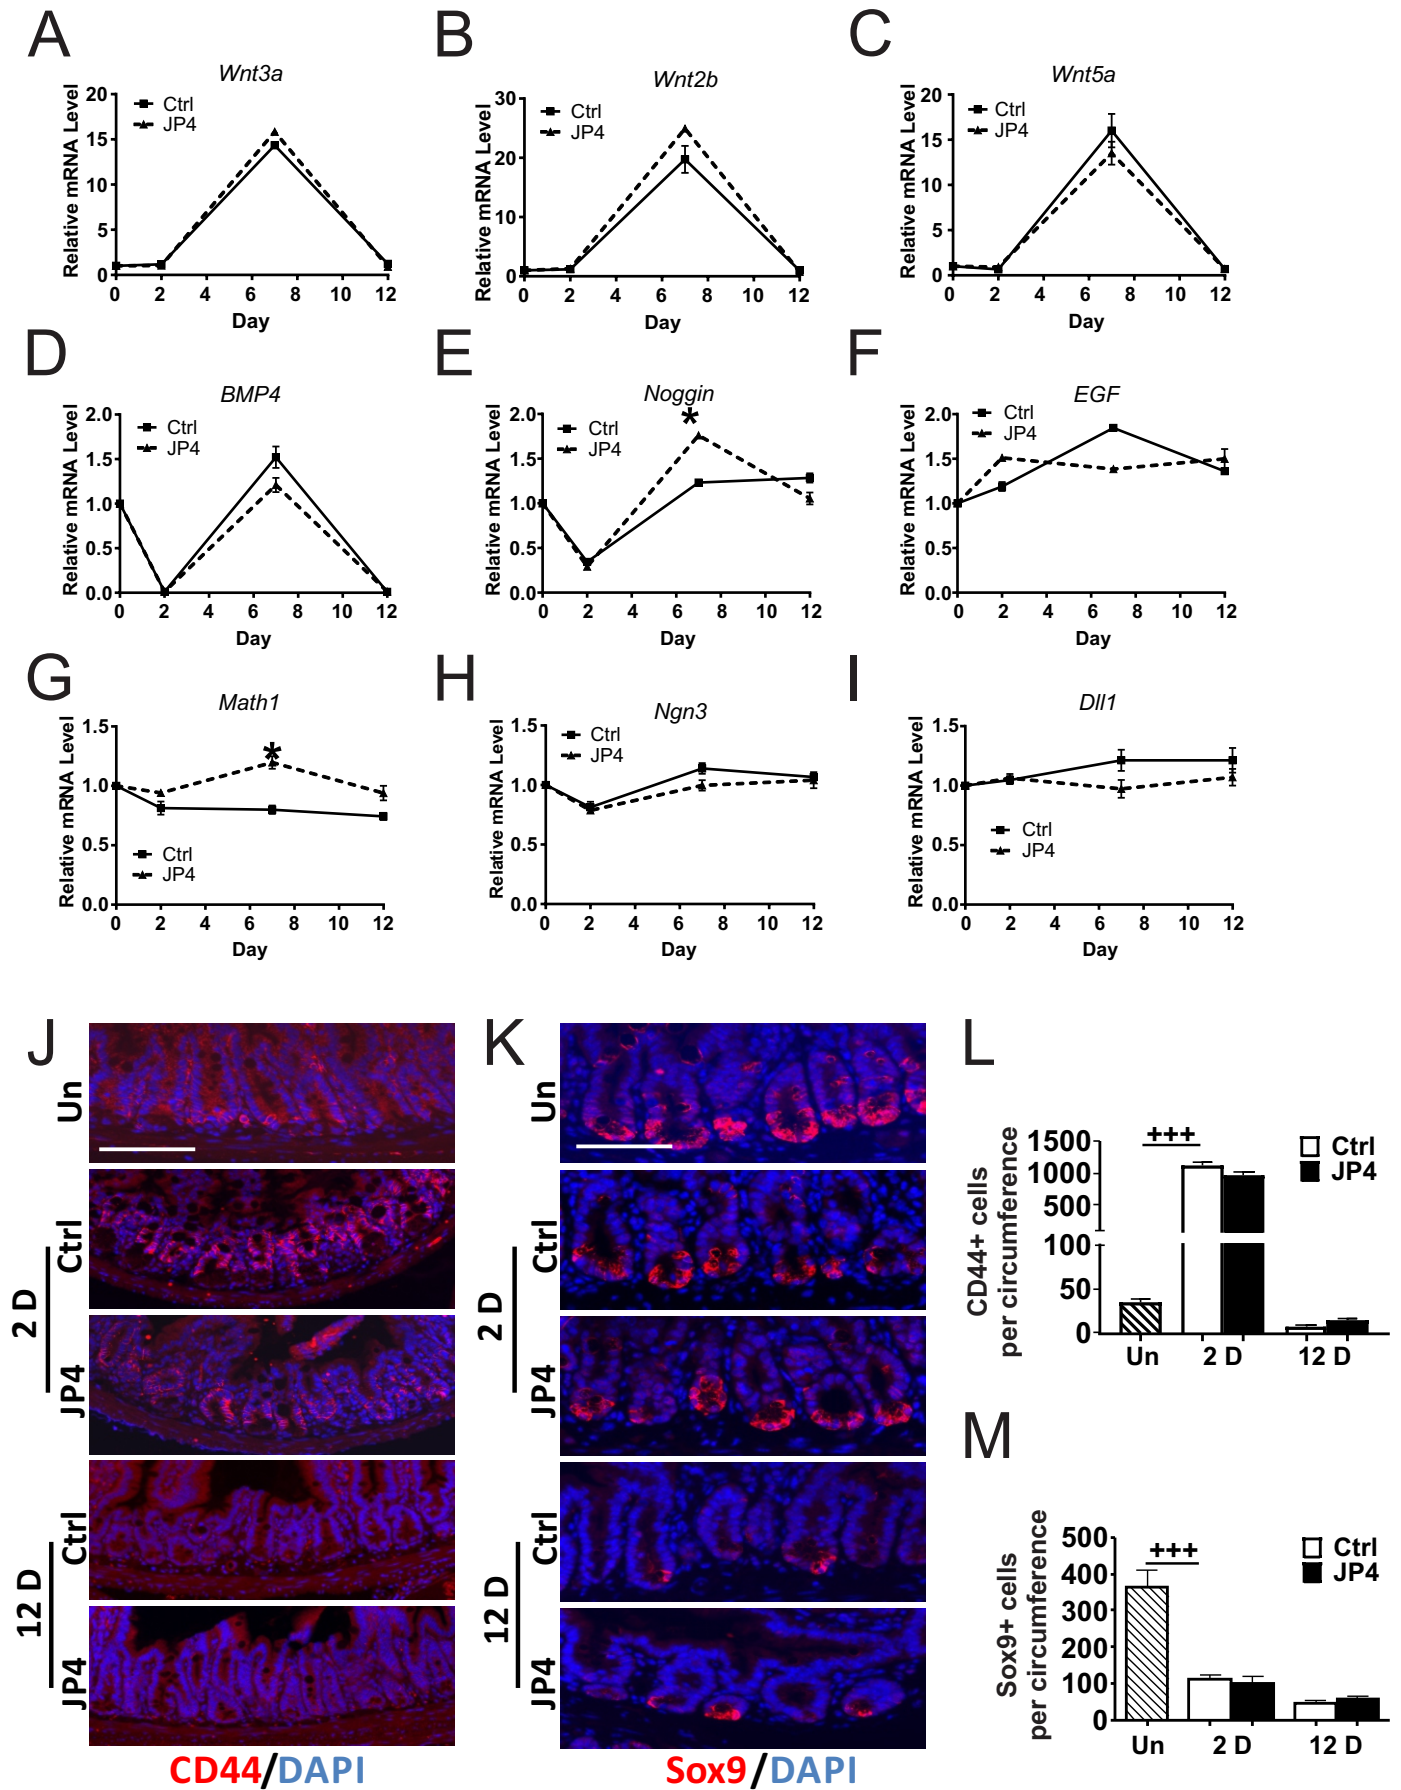



Fig S6 related to Fig 6

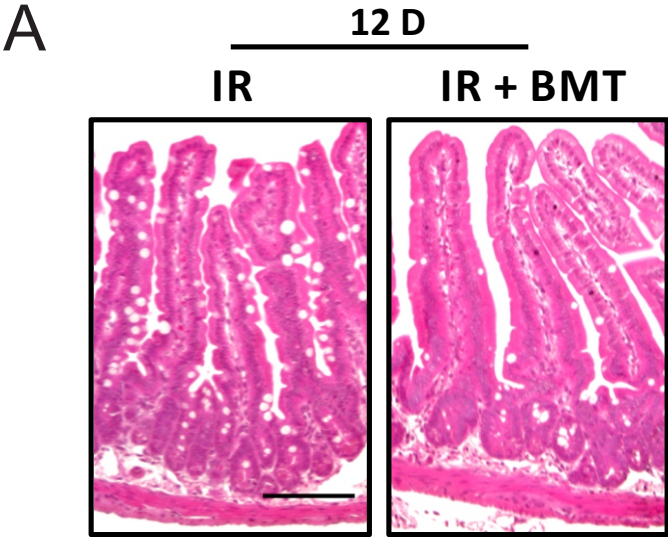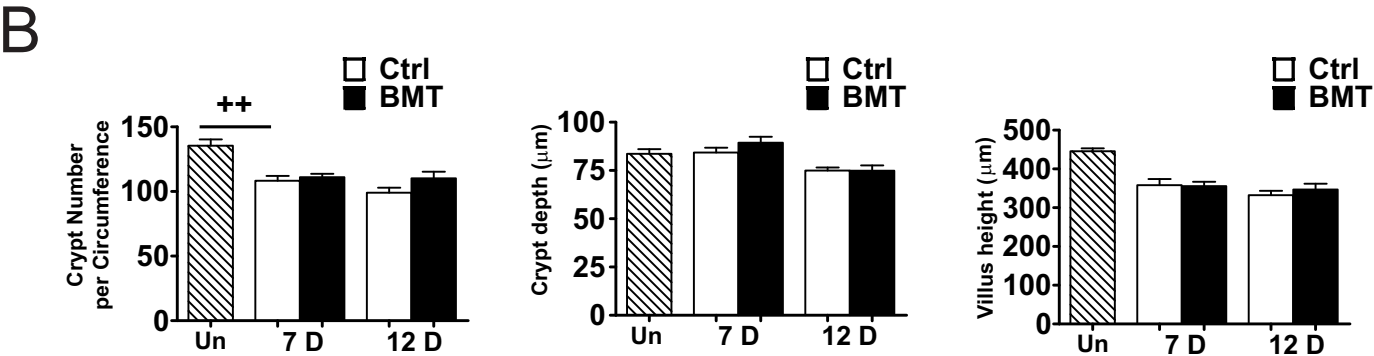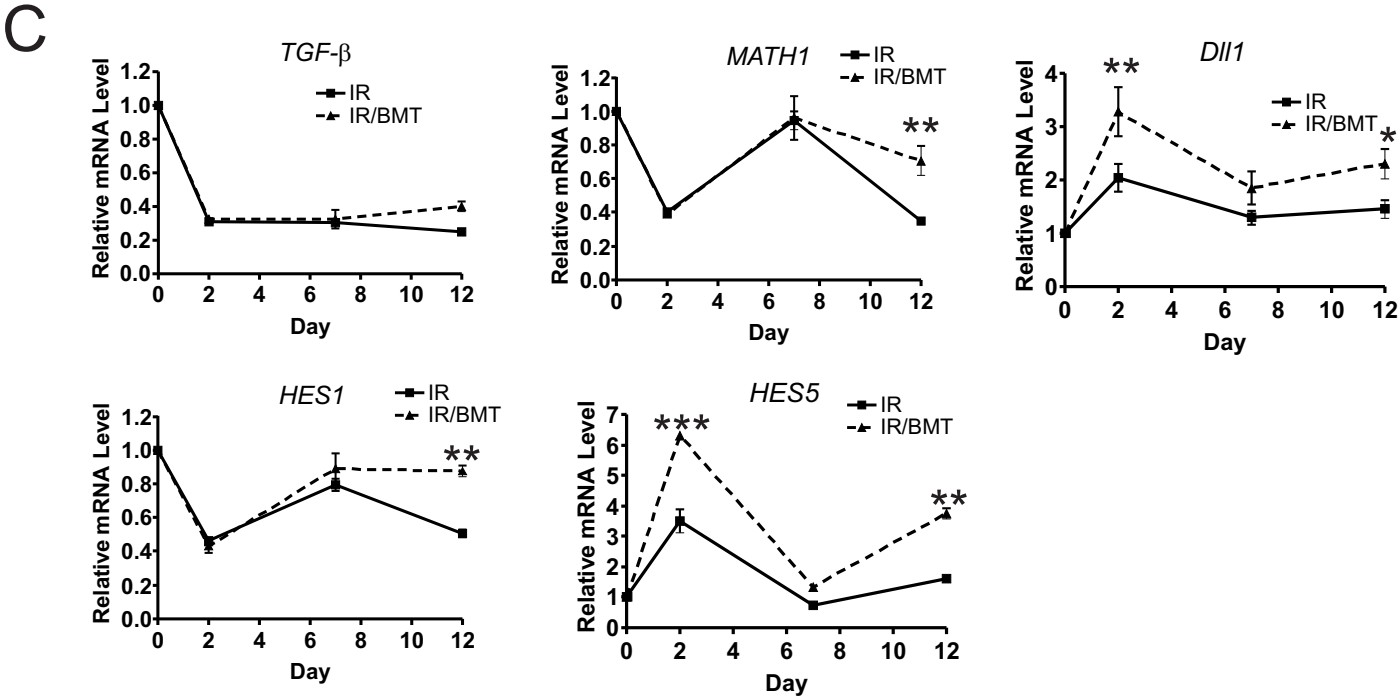

Fig S7 related to Fig 7

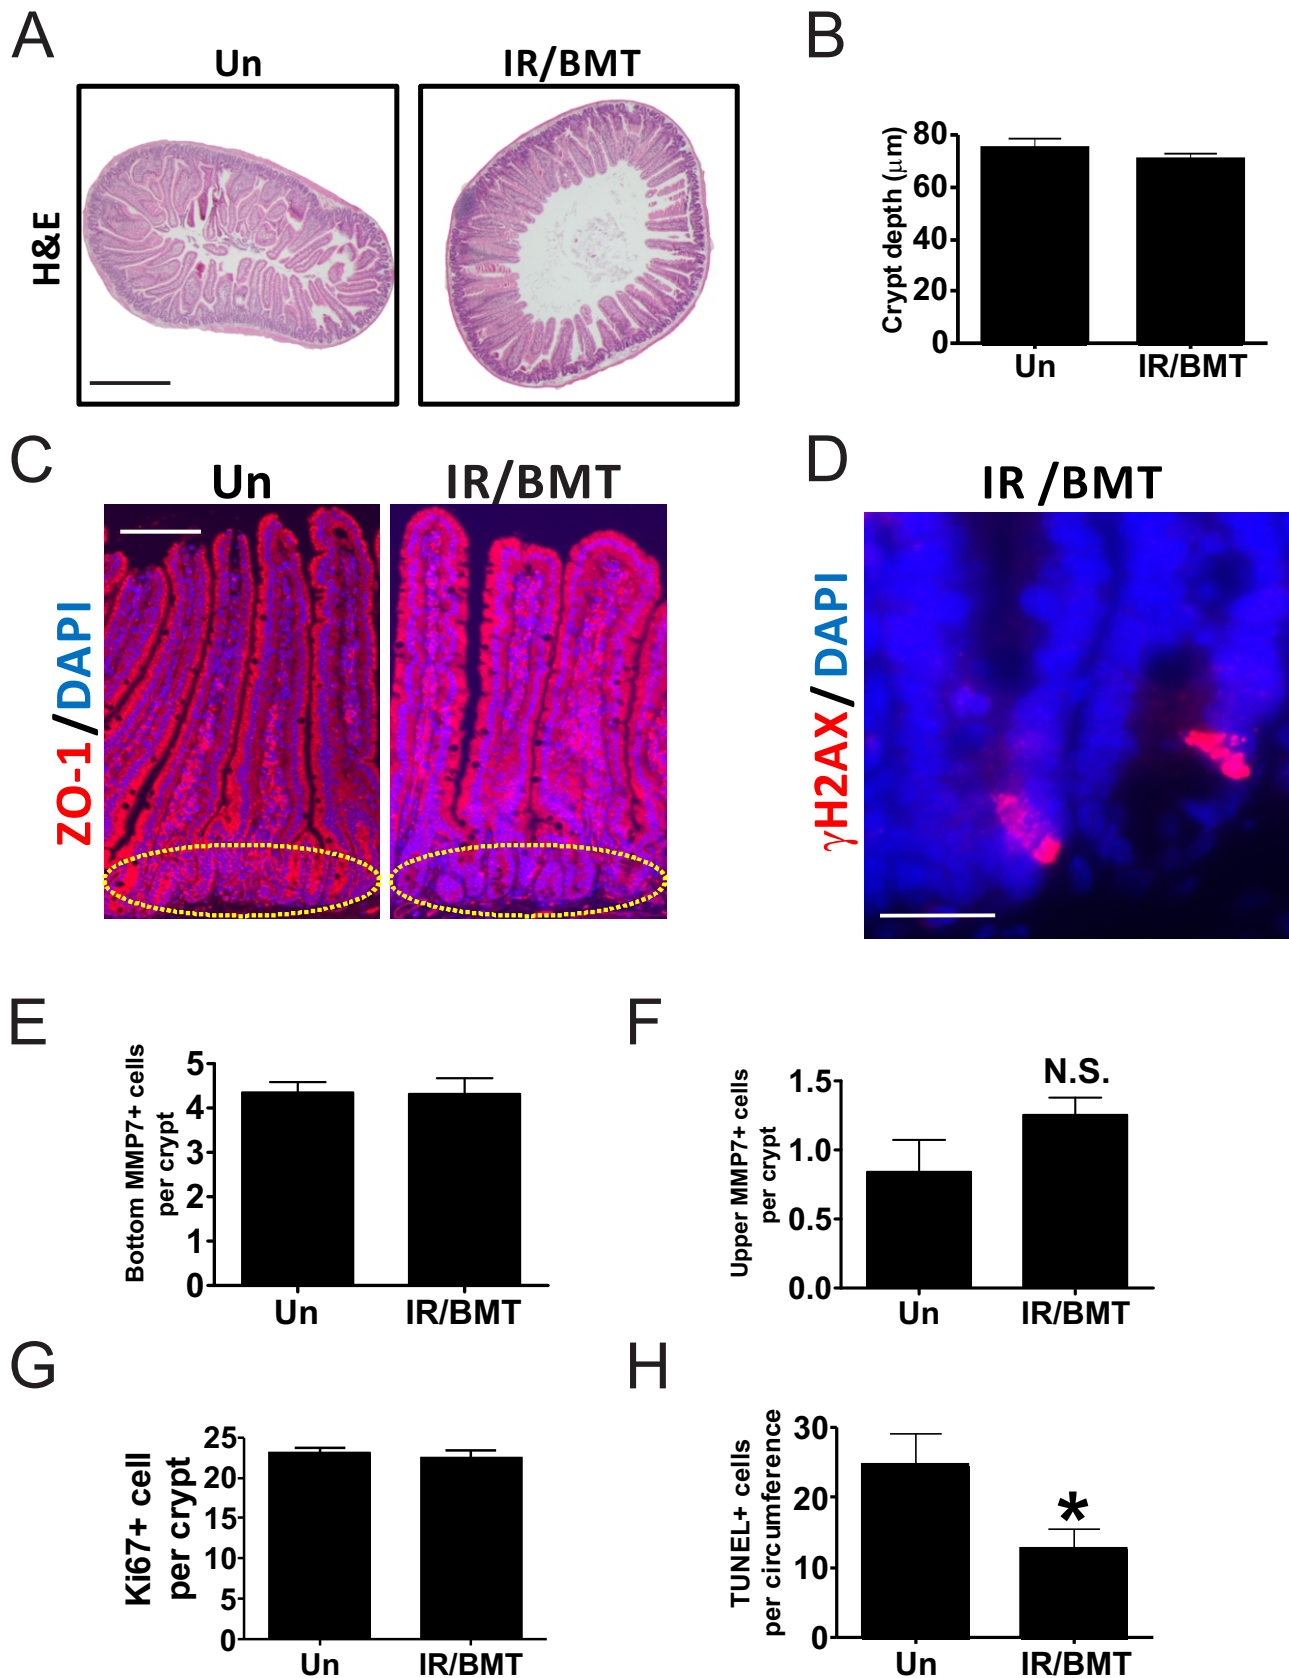

Supplement: 41598_2018_20370_MOESM1_ESM.pdf [file 41598_2018_20370_MOESM1_ESM.pdf]
